# Supplementary material for: Biometeorological and Molecular Innovative Study for Modelling and Assessing the Impact of Heat Stress on Water Buffalo Dairy Production: Promising Adaptive Strategies to Cope with Climate Change in Egypt
Source: Research Square preprint supplement (doi:10.21203/rs.3.rs-5737372/v1), 2025-01-01
Supplement: Supplementary file 1 [file cec3a40f5c782c71d427360b.pdf]

# Impact of Heat Stress on Production and Quality of Domestic Buffalo Dairies: Novel Detection Approaches and Adaptative Strategies to Cope with Climate Change in Egypt

Eman M. Ismail<sup>1\*</sup>, Aly M. Aly<sup>2</sup>, Heba S. Farag<sup>3</sup>, Shaimaa M. S. Kamel<sup>4</sup>, and Karima M. Fahim<sup>5</sup>

**Supplementary Table S1. Meteorological data from 1<sup>st</sup> Sept to 17<sup>th</sup> Oct- 2023, study duration for the control group (Gp A) and modified group (Gp B)**

| Experiment day | Day/month             | Air Temperature (°C) |              | DP (°C) |       | RH (%) |       | THI                |                    |
|----------------|-----------------------|----------------------|--------------|---------|-------|--------|-------|--------------------|--------------------|
|                |                       | Gp A (AT °C)         | Gp B (BT °C) | Gp A    | Gp B  | Gp A   | Gp B  | Gp A               | Gp B               |
| 1              | 1 <sup>st</sup> Sept  | 33                   | 28           | 18.77   | 14.88 | 43.02  | 44.76 | 80.80 <sup>a</sup> | 74.89 <sup>c</sup> |
| 2              | 2 <sup>nd</sup> Sept  | 33                   | 27           | 18.6    | 13.02 | 41.41  | 42.06 | 80.50 <sup>a</sup> | 73.30 <sup>c</sup> |
| 3              | 3 <sup>rd</sup> Sept  | 33                   | 27           | 18.49   | 17.4  | 42.28  | 55.73 | 80.66 <sup>a</sup> | 75.02 <sup>c</sup> |
| 4              | 4 <sup>th</sup> Sept  | 34                   | 28           | 19.64   | 7.64  | 42.94  | 27.70 | 82.02 <sup>a</sup> | 72.57 <sup>c</sup> |
| 5              | 5 <sup>th</sup> Sept  | 34                   | 27           | 19.88   | 15.46 | 43.59  | 49.26 | 82.14 <sup>a</sup> | 74.21 <sup>c</sup> |
| 6              | 6 <sup>th</sup> Sept  | 33                   | 27           | 19.39   | 12.19 | 44.72  | 39.83 | 81.12 <sup>a</sup> | 73.02 <sup>c</sup> |
| 7              | 7 <sup>th</sup> Sept  | 33                   | 28           | 19.73   | 15.21 | 45.67  | 45.72 | 81.30 <sup>a</sup> | 75.02 <sup>c</sup> |
| 8              | 8 <sup>th</sup> Sept  | 33                   | 28           | 20.18   | 13.31 | 46.96  | 40.43 | 81.53 <sup>a</sup> | 74.30 <sup>c</sup> |
| 9              | 9 <sup>th</sup> Sept  | 34                   | 28           | 19.57   | 11.63 | 42.76  | 36.21 | 81.98 <sup>a</sup> | 73.72 <sup>c</sup> |
| 10             | 10 <sup>th</sup> Sept | 33                   | 28           | 19.36   | 13.5  | 44.63  | 40.93 | 81.10 <sup>a</sup> | 74.37 <sup>c</sup> |
| 11             | 11 <sup>th</sup> Sept | 35                   | 29           | 18.23   | 14.57 | 37.20  | 41.39 | 82.06 <sup>a</sup> | 75.64 <sup>b</sup> |
| 12             | 12 <sup>th</sup> Sept | 34                   | 27           | 19.94   | 11.98 | 43.75  | 39.29 | 82.18 <sup>a</sup> | 72.95 <sup>d</sup> |
| 13             | 13 <sup>th</sup> Sept | 33                   | 27           | 19.69   | 8.64  | 45.56  | 31.44 | 81.27 <sup>a</sup> | 71.96 <sup>d</sup> |
| 14             | 14 <sup>th</sup> Sept | 32                   | 26           | 15.34   | 5.50  | 36.63  | 26.89 | 78.45 <sup>b</sup> | 70.32 <sup>d</sup> |
| 15             | 15 <sup>th</sup> Sept | 30                   | 25           | 13.69   | 5.77  | 36.91  | 29.08 | 76.16 <sup>b</sup> | 69.48 <sup>d</sup> |
| 16             | 16 <sup>th</sup> Sept | 31                   | 26           | 14.32   | 12.52 | 36.31  | 43.18 | 77.23 <sup>b</sup> | 72.21 <sup>d</sup> |
| 17             | 17 <sup>th</sup> Sept | 32                   | 26           | 18.6    | 6.50  | 45.04  | 28.82 | 79.93 <sup>b</sup> | 70.54 <sup>d</sup> |
| 18             | 18 <sup>th</sup> Sept | 32                   | 26           | 16.3    | 10.36 | 38.95  | 37.43 | 78.86 <sup>b</sup> | 71.54 <sup>d</sup> |
| 19             | 19 <sup>th</sup> Sept | 32                   | 26           | 18.17   | 10.23 | 43.84  | 37.11 | 79.72 <sup>b</sup> | 71.50 <sup>d</sup> |
| 20             | 20 <sup>th</sup> Sept | 32                   | 25           | 17.38   | 9.50  | 41.71  | 37.50 | 79.34 <sup>b</sup> | 70.38 <sup>d</sup> |
| 21             | 21 <sup>st</sup> Sept | 32                   | 25           | 15.35   | 5.46  | 36.66  | 28.46 | 78.45 <sup>b</sup> | 69.42 <sup>d</sup> |
| 22             | 22 <sup>nd</sup> Sept | 34                   | 27           | 14.44   | 7.22  | 30.90  | 28.54 | 79.66 <sup>b</sup> | 71.60 <sup>d</sup> |
| 23             | 23 <sup>rd</sup> Sept | 34                   | 27           | 18.96   | 10.55 | 41.17  | 35.74 | 81.67 <sup>a</sup> | 72.50 <sup>d</sup> |
| 24             | 24 <sup>th</sup> Sept | 35                   | 29           | 18.36   | 15.00 | 37.50  | 42.56 | 82.13 <sup>a</sup> | 75.81 <sup>b</sup> |
| 25             | 25 <sup>th</sup> Sept | 35                   | 29           | 18.43   | 13.70 | 37.67  | 39.13 | 82.16 <sup>a</sup> | 75.31 <sup>c</sup> |
| 26             | 26 <sup>th</sup> Sept | 36                   | 30           | 19.00   | 11.41 | 36.94  | 31.78 | 83.18 <sup>a</sup> | 75.36 <sup>c</sup> |
| 27             | 27 <sup>th</sup> Sept | 36                   | 30           | 18.26   | 10.50 | 35.27  | 29.92 | 82.82 <sup>a</sup> | 75.07 <sup>c</sup> |
| 28             | 28 <sup>th</sup> Sept | 36                   | 30           | 15.04   | 10.00 | 28.74  | 28.94 | 81.41 <sup>a</sup> | 74.91 <sup>c</sup> |
| 29             | 29 <sup>th</sup> Sept | 37                   | 31           | 14.68   | 10.70 | 26.59  | 28.63 | 82.01 <sup>a</sup> | 75.95 <sup>b</sup> |
| 30             | 30 <sup>th</sup> Sept | 37                   | 30           | 17.65   | 9.55  | 32.13  | 28.08 | 83.26 <sup>a</sup> | 74.78 <sup>c</sup> |
| 31             | 1 <sup>st</sup> Oct   | 37                   | 31           | 18.77   | 11.41 | 34.47  | 30.01 | 83.80 <sup>a</sup> | 76.18 <sup>b</sup> |
| 32             | 2 <sup>nd</sup> Oct   | 36                   | 30           | 18.60   | 12.52 | 36.41  | 34.19 | 83.06 <sup>a</sup> | 75.73 <sup>b</sup> |
| 33             | 3 <sup>rd</sup> Oct   | 32                   | 26           | 18.49   | 6.77  | 44.73  | 29.36 | 79.87 <sup>b</sup> | 70.61 <sup>d</sup> |
| 34             | 4 <sup>th</sup> Oct   | 31                   | 26           | 15.79   | 10.35 | 39.91  | 37.41 | 77.83 <sup>b</sup> | 71.54 <sup>d</sup> |
| 35             | 5 <sup>th</sup> Oct   | 32                   | 26           | 17.54   | 12.52 | 42.14  | 43.18 | 79.42 <sup>b</sup> | 72.21 <sup>d</sup> |
| 36             | 6 <sup>th</sup> Oct   | 29                   | 24           | 15.98   | 8.19  | 45.32  | 36.44 | 76.22 <sup>b</sup> | 69.10 <sup>d</sup> |
| 37             | 7 <sup>th</sup> Oct   | 28                   | 23           | 12.33   | 8.09  | 37.92  | 38.44 | 73.96 <sup>c</sup> | 68.11 <sup>d</sup> |

|                 |                            |                               |                               |                             |                             |                               |                               |                                           |                                          |
|-----------------|----------------------------|-------------------------------|-------------------------------|-----------------------------|-----------------------------|-------------------------------|-------------------------------|-------------------------------------------|------------------------------------------|
| <b>38</b>       | <b>8<sup>th</sup> Oct</b>  | 28                            | 23                            | 13.02                       | 9.35                        | 39.67                         | 41.86                         | <b>74.20<sup>c</sup></b>                  | <b>68.40<sup>d</sup></b>                 |
| <b>39</b>       | <b>9<sup>th</sup> Oct</b>  | 28                            | 23                            | 13.50                       | 7.26                        | 40.93                         | 36.33                         | <b>74.37<sup>c</sup></b>                  | <b>67.92<sup>d</sup></b>                 |
| <b>40</b>       | <b>10<sup>th</sup> Oct</b> | 23                            | 20                            | 15.50                       | 9.83                        | 62.68                         | 51.95                         | <b>70.20<sup>c</sup></b>                  | <b>65.31<sup>d</sup></b>                 |
| <b>41</b>       | <b>11<sup>th</sup> Oct</b> | 29                            | 24                            | 15.00                       | 8.19                        | 42.56                         | 36.44                         | <b>75.81<sup>b</sup></b>                  | <b>69.10<sup>d</sup></b>                 |
| <b>42</b>       | <b>12<sup>th</sup> Oct</b> | 28                            | 22                            | 16.35                       | 10.50                       | 49.17                         | 48.04                         | <b>75.49<sup>b</sup></b>                  | <b>67.65<sup>d</sup></b>                 |
| <b>43</b>       | <b>13<sup>th</sup> Oct</b> | 28                            | 23                            | 14.88                       | 10.60                       | 44.76                         | 45.51                         | <b>74.89<sup>c</sup></b>                  | <b>68.71<sup>d</sup></b>                 |
| <b>44</b>       | <b>14<sup>th</sup> Oct</b> | 28                            | 22                            | 14.65                       | 10.73                       | 44.10                         | 48.78                         | <b>74.80<sup>c</sup></b>                  | <b>67.71<sup>d</sup></b>                 |
| <b>45</b>       | <b>15<sup>th</sup> Oct</b> | 32                            | 26                            | 12.16                       | 11.63                       | 29.80                         | 40.72                         | <b>77.24<sup>b</sup></b>                  | <b>71.92<sup>d</sup></b>                 |
| <b>46</b>       | <b>16<sup>th</sup> Oct</b> | 30                            | 24                            | 11.41                       | 8.19                        | 31.78                         | 36.44                         | <b>75.40<sup>b</sup></b>                  | <b>69.10<sup>d</sup></b>                 |
| <b>47</b>       | <b>17<sup>th</sup> Oct</b> | 28                            | 22                            | 15.71                       | 10.95                       | 47.21                         | 49.50                         | <b>75.22<sup>b</sup></b>                  | <b>67.76<sup>d</sup></b>                 |
| <b>Mean ±SE</b> |                            | <b>32.23 ±</b><br><b>0.43</b> | <b>26.40 ±</b><br><b>0.38</b> | <b>16.9±</b><br><b>0.35</b> | <b>10.7±</b><br><b>0.41</b> | <b>40.45 ±</b><br><b>0.90</b> | <b>37.89 ±</b><br><b>1.05</b> | <b>79.29<sup>b</sup></b><br><b>± 0.46</b> | <b>72.02<sup>d</sup></b><br><b>±0.41</b> |

AT °C: Ambient Temperature outside barn (°C), BT °C: inside Barn Temperature (°C), DP) °C: Dew Point (°C), RH (%): Relative Humidity %, THI: Temperature Humidity Index  
Hs modelling: <sup>a</sup> CHSZ ( ≥ 80.28), <sup>b</sup> SHSZ (75.40-80.27), <sup>c</sup> MHSZ (73.22-75.39), <sup>d</sup> (NHSZ (56.71-73.21)

**Supplementary Table S2. Total and average Daily Milk production data sheets from 1<sup>st</sup> Sept to 17<sup>th</sup> Oct- 2023, study duration for each buffalo of the control (Gp A) and modified group (Gp B)**

| No. | Day/month             | Daily Milk Yield/buffalo of Gp A |      |      |      |      |      | TDMY<br>Gp A<br>(A1-A6) | Daily Milk Yield/buffalo of Gp B |      |      |      |      |      | TDMY<br>Gp B<br>(B1-B6) |
|-----|-----------------------|----------------------------------|------|------|------|------|------|-------------------------|----------------------------------|------|------|------|------|------|-------------------------|
|     |                       | A1                               | A2   | A3   | A4   | A5   | A6   |                         | B1                               | B2   | B3   | B4   | B5   | B6   |                         |
| 1   | 1 <sup>st</sup> Sept  | 2.68                             | 3.80 | 3.07 | 3.11 | 4.67 | 3.69 | <b>21.02</b>            | 6.25                             | 6.32 | 4.66 | 4.89 | 4.92 | 4.81 | <b>31.85</b>            |
| 2   | 2 <sup>nd</sup> Sept  | 2.68                             | 3.80 | 3.10 | 3.12 | 4.67 | 3.69 | <b>21.06</b>            | 6.75                             | 6.70 | 4.26 | 5.10 | 5.13 | 4.97 | <b>32.91</b>            |
| 3   | 3 <sup>rd</sup> Sept  | 2.71                             | 3.85 | 3.13 | 3.13 | 4.67 | 3.69 | <b>21.18</b>            | 6.85                             | 6.70 | 4.28 | 5.12 | 5.13 | 4.97 | <b>33.05</b>            |
| 4   | 4 <sup>th</sup> Sept  | 2.55                             | 3.27 | 3.45 | 2.87 | 4.54 | 3.47 | <b>20.15</b>            | 6.35                             | 6.40 | 4.69 | 4.90 | 4.95 | 4.81 | <b>32.10</b>            |
| 5   | 5 <sup>th</sup> Sept  | 2.58                             | 3.33 | 3.45 | 2.88 | 4.54 | 3.47 | <b>20.25</b>            | 6.97                             | 6.70 | 4.29 | 5.12 | 5.13 | 4.99 | <b>33.20</b>            |
| 6   | 6 <sup>th</sup> Sept  | 2.75                             | 3.89 | 3.61 | 3.22 | 4.75 | 3.72 | <b>21.94</b>            | 7.05                             | 6.72 | 4.32 | 5.20 | 5.15 | 5.03 | <b>33.47</b>            |
| 7   | 7 <sup>th</sup> Sept  | 2.75                             | 3.92 | 3.62 | 3.28 | 4.75 | 3.75 | <b>22.07</b>            | 6.50                             | 6.45 | 4.69 | 4.94 | 5.00 | 4.82 | <b>32.40</b>            |
| 8   | 8 <sup>th</sup> Sept  | 2.75                             | 3.97 | 3.62 | 3.28 | 4.75 | 3.75 | <b>22.12</b>            | 6.60                             | 6.45 | 4.69 | 4.97 | 5.00 | 4.87 | <b>32.58</b>            |
| 9   | 9 <sup>th</sup> Sept  | 2.58                             | 3.40 | 3.50 | 2.94 | 4.54 | 3.53 | <b>20.49</b>            | 6.67                             | 6.45 | 4.72 | 5.00 | 5.01 | 4.9  | <b>32.75</b>            |
| 10  | 10 <sup>th</sup> Sept | 2.76                             | 4.00 | 3.63 | 3.32 | 4.75 | 4.78 | <b>23.24</b>            | 6.67                             | 6.45 | 4.74 | 5.00 | 5.01 | 4.9  | <b>32.77</b>            |
| 11  | 11 <sup>th</sup> Sept | 2.45                             | 3.20 | 3.35 | 2.60 | 4.47 | 3.49 | <b>19.47</b>            | 5.60                             | 6.13 | 4.50 | 4.72 | 4.86 | 4.77 | <b>30.58</b>            |
| 12  | 12 <sup>th</sup> Sept | 2.61                             | 3.45 | 3.53 | 2.95 | 4.60 | 3.55 | <b>20.69</b>            | 7.18                             | 6.72 | 4.35 | 5.20 | 5.18 | 5.05 | <b>33.68</b>            |
| 13  | 13 <sup>th</sup> Sept | 2.78                             | 4.04 | 3.65 | 3.34 | 4.75 | 4.78 | <b>23.34</b>            | 7.30                             | 6.75 | 4.40 | 5.21 | 5.20 | 5.07 | <b>33.93</b>            |
| 14  | 14 <sup>th</sup> Sept | 3.08                             | 4.14 | 3.65 | 3.50 | 4.80 | 3.85 | <b>23.02</b>            | 7.54                             | 6.80 | 4.52 | 5.37 | 5.24 | 5.12 | <b>34.59</b>            |
| 15  | 15 <sup>th</sup> Sept | 3.65                             | 4.14 | 3.97 | 4.04 | 4.94 | 4.23 | <b>24.97</b>            | 8.35                             | 7.30 | 4.80 | 5.60 | 5.42 | 5.95 | <b>37.42</b>            |
| 16  | 16 <sup>th</sup> Sept | 3.50                             | 4.17 | 3.92 | 4.04 | 4.90 | 4.18 | <b>24.71</b>            | 7.67                             | 6.80 | 4.54 | 5.37 | 5.24 | 5.12 | <b>34.74</b>            |
| 17  | 17 <sup>th</sup> Sept | 3.10                             | 4.20 | 3.65 | 3.65 | 4.80 | 3.87 | <b>23.27</b>            | 7.78                             | 6.90 | 4.55 | 5.37 | 5.30 | 5.22 | <b>35.12</b>            |
| 18  | 18 <sup>th</sup> Sept | 3.18                             | 4.20 | 3.65 | 3.72 | 4.80 | 3.97 | <b>23.52</b>            | 7.80                             | 7.00 | 4.58 | 5.45 | 5.30 | 5.32 | <b>35.45</b>            |
| 19  | 19 <sup>th</sup> Sept | 3.24                             | 4.25 | 3.65 | 3.74 | 4.81 | 4.00 | <b>23.69</b>            | 8.00                             | 7.00 | 4.63 | 5.45 | 5.30 | 5.4  | <b>35.78</b>            |
| 20  | 20 <sup>th</sup> Sept | 3.27                             | 4.33 | 3.67 | 3.78 | 4.82 | 4.04 | <b>23.91</b>            | 8.37                             | 7.43 | 4.80 | 5.60 | 5.42 | 6.17 | <b>37.79</b>            |
| 21  | 21 <sup>st</sup> Sept | 3.32                             | 4.45 | 3.78 | 3.80 | 4.82 | 4.04 | <b>24.21</b>            | 8.55                             | 7.43 | 4.80 | 5.65 | 5.42 | 6.32 | <b>38.17</b>            |
| 22  | 22 <sup>nd</sup> Sept | 2.62                             | 3.45 | 3.57 | 2.97 | 4.60 | 3.62 | <b>20.83</b>            | 7.35                             | 6.75 | 4.45 | 5.28 | 5.20 | 5.11 | <b>34.14</b>            |
| 23  | 23 <sup>rd</sup> Sept | 2.65                             | 3.49 | 3.57 | 2.99 | 4.60 | 4.65 | <b>21.95</b>            | 7.40                             | 6.75 | 4.45 | 5.28 | 5.20 | 5.11 | <b>34.19</b>            |
| 24  | 24 <sup>th</sup> Sept | 2.46                             | 3.20 | 3.37 | 2.63 | 4.47 | 3.40 | <b>19.53</b>            | 5.77                             | 6.25 | 4.60 | 4.75 | 4.86 | 4.77 | <b>31.00</b>            |
| 25  | 25 <sup>th</sup> Sept | 2.47                             | 3.23 | 3.40 | 2.67 | 4.50 | 3.40 | <b>19.67</b>            | 5.85                             | 6.25 | 4.62 | 4.79 | 4.87 | 4.77 | <b>31.15</b>            |
| 26  | 26 <sup>th</sup> Sept | 2.15                             | 2.82 | 3.22 | 2.47 | 4.37 | 3.32 | <b>18.35</b>            | 5.20                             | 6.03 | 4.32 | 4.58 | 4.80 | 4.62 | <b>29.55</b>            |
| 27  | 27 <sup>th</sup> Sept | 2.17                             | 2.87 | 3.24 | 2.47 | 4.37 | 3.32 | <b>18.44</b>            | 5.32                             | 6.03 | 4.34 | 4.59 | 4.82 | 4.67 | <b>29.77</b>            |
| 28  | 28 <sup>th</sup> Sept | 2.18                             | 2.90 | 3.28 | 2.50 | 4.37 | 3.35 | <b>18.58</b>            | 5.35                             | 6.05 | 4.35 | 4.62 | 4.82 | 4.67 | <b>29.86</b>            |
| 29  | 29 <sup>th</sup> Sept | 2.10                             | 2.50 | 3.07 | 2.39 | 4.25 | 3.23 | <b>17.54</b>            | 4.94                             | 5.70 | 4.30 | 4.56 | 4.75 | 4.52 | <b>28.77</b>            |
| 30  | 30 <sup>th</sup> Sept | 2.10                             | 2.52 | 3.10 | 2.35 | 4.25 | 3.23 | <b>17.55</b>            | 5.40                             | 6.03 | 4.40 | 4.62 | 4.82 | 4.67 | <b>29.94</b>            |

|                                                   |                      |      |      |      |      |      |      |              |                                    |                                                   |      |      |      |      |              |                                    |
|---------------------------------------------------|----------------------|------|------|------|------|------|------|--------------|------------------------------------|---------------------------------------------------|------|------|------|------|--------------|------------------------------------|
| 31                                                | 1 <sup>st</sup> Oct  | 2.09 | 2.55 | 3.13 | 2.35 | 4.27 | 3.23 | <b>17.62</b> | 5.00                               | 5.80                                              | 4.30 | 4.56 | 4.75 | 4.52 | <b>28.93</b> |                                    |
| 32                                                | 2 <sup>nd</sup> Oct  | 2.20 | 2.95 | 3.28 | 2.50 | 4.42 | 3.36 | <b>18.71</b> | 5.47                               | 6.00                                              | 4.47 | 4.62 | 4.84 | 4.69 | <b>30.12</b> |                                    |
| 33                                                | 3 <sup>rd</sup> Oct  | 3.37 | 4.33 | 3.82 | 3.88 | 4.84 | 4.07 | <b>24.31</b> | 8.05                               | 7.00                                              | 4.65 | 5.47 | 5.30 | 5.42 | <b>35.89</b> |                                    |
| 34                                                | 4 <sup>th</sup> Oct  | 3.55 | 4.80 | 3.92 | 4.00 | 4.90 | 4.20 | <b>25.37</b> | 8.10                               | 7.05                                              | 4.69 | 5.54 | 5.35 | 8.50 | <b>39.23</b> |                                    |
| 35                                                | 5 <sup>th</sup> Oct  | 3.43 | 4.45 | 3.90 | 3.99 | 4.84 | 4.07 | <b>24.68</b> | 8.12                               | 7.11                                              | 4.72 | 5.54 | 5.38 | 5.52 | <b>36.39</b> |                                    |
| 36                                                | 6 <sup>th</sup> Oct  | 3.92 | 5.24 | 4.00 | 4.11 | 4.97 | 4.44 | <b>26.68</b> | 8.72                               | 7.55                                              | 4.84 | 5.75 | 5.50 | 6.47 | <b>38.83</b> |                                    |
| 37                                                | 7 <sup>th</sup> Oct  | 3.97 | 5.35 | 3.92 | 4.14 | 5.02 | 4.60 | <b>27.00</b> | 9.03                               | 8.00                                              | 5.00 | 5.90 | 5.55 | 6.57 | <b>40.05</b> |                                    |
| 38                                                | 8 <sup>th</sup> Oct  | 3.99 | 5.45 | 3.95 | 4.15 | 5.07 | 4.60 | <b>27.21</b> | 8.96                               | 8.05                                              | 5.00 | 5.95 | 5.72 | 6.65 | <b>40.33</b> |                                    |
| 39                                                | 9 <sup>th</sup> Oct  | 3.99 | 5.50 | 3.99 | 4.15 | 5.09 | 4.60 | <b>27.32</b> | 9.06                               | 8.05                                              | 5.00 | 6.00 | 5.77 | 6.72 | <b>40.00</b> |                                    |
| 40                                                | 10 <sup>th</sup> Oct | 4.45 | 5.67 | 4.17 | 4.30 | 5.12 | 4.64 | <b>28.35</b> | 9.15                               | 8.43                                              | 6.15 | 6.72 | 7.60 | 7.32 | <b>45.37</b> |                                    |
| 41                                                | 11 <sup>th</sup> Oct | 3.95 | 5.35 | 4.00 | 4.13 | 4.97 | 4.49 | <b>26.89</b> | 8.84                               | 7.60                                              | 4.90 | 5.76 | 5.50 | 6.49 | <b>39.09</b> |                                    |
| 42                                                | 12 <sup>th</sup> Oct | 4.03 | 6.55 | 4.10 | 4.15 | 5.12 | 4.60 | <b>28.55</b> | 9.07                               | 8.15                                              | 5.20 | 6.50 | 6.25 | 6.97 | <b>42.14</b> |                                    |
| 43                                                | 13 <sup>th</sup> Oct | 4.00 | 5.56 | 4.10 | 4.16 | 5.17 | 4.62 | <b>27.61</b> | 9.07                               | 8.05                                              | 5.02 | 6.00 | 5.87 | 6.80 | <b>40.81</b> |                                    |
| 44                                                | 14 <sup>th</sup> Oct | 4.05 | 5.62 | 4.12 | 4.18 | 5.09 | 4.61 | <b>27.67</b> | 9.08                               | 8.15                                              | 5.40 | 5.83 | 6.57 | 7.05 | <b>42.08</b> |                                    |
| 45                                                | 15 <sup>th</sup> Oct | 3.43 | 4.95 | 3.92 | 3.99 | 4.87 | 4.07 | <b>25.23</b> | 8.17                               | 7.35                                              | 4.74 | 5.55 | 5.38 | 5.65 | <b>36.84</b> |                                    |
| 46                                                | 16 <sup>th</sup> Oct | 3.90 | 5.12 | 3.97 | 4.06 | 4.94 | 4.28 | <b>26.27</b> | 8.92                               | 7.70                                              | 4.90 | 5.83 | 5.51 | 6.52 | <b>39.38</b> |                                    |
| 47                                                | 17 <sup>th</sup> Oct | 4.05 | 5.55 | 4.10 | 4.18 | 5.25 | 4.63 | <b>27.76</b> | 9.12                               | 8.15                                              | 5.60 | 6.60 | 6.87 | 7.05 | <b>43.39</b> |                                    |
| Mean $\pm$ SE of the total Daily milk yield (DMY) |                      |      |      |      |      |      |      |              | <b>22.94 <math>\pm</math> 0.47</b> | Mean $\pm$ SE of the total Daily milk yield (DMY) |      |      |      |      |              | <b>35.15 <math>\pm</math> 0.61</b> |

A1-A6: Buffalo of group A 1-6; B1-6: Buffalo of group B

**Supplementary Table S3. Physiological assessment: rectal temperature °C (RT) data sheets from 1<sup>st</sup> Sept to 17<sup>th</sup> Oct- 2023, study duration for each buffalo of the control (Gp A) and modified group (Gp B)**

| Day no. | Day/month             | RT °C/buffalo of Gp A |       |       |       |       |       | Average RT °C/<br>gp A | RT °C/buffalo of Gp B |       |       |       |       |       | Average RT °C/<br>gp A |
|---------|-----------------------|-----------------------|-------|-------|-------|-------|-------|------------------------|-----------------------|-------|-------|-------|-------|-------|------------------------|
|         |                       | A1                    | A2    | A3    | A4    | A5    | A6    |                        | B1                    | B2    | B3    | B4    | B5    | B6    |                        |
| 1       | 1 <sup>st</sup> Sept  | 39.21                 | 39.22 | 39.12 | 39.10 | 39.12 | 39.10 | <b>39.15</b>           | 37.50                 | 37.85 | 37.35 | 38.52 | 38.50 | 38.00 | <b>37.95</b>           |
| 2       | 2 <sup>nd</sup> Sept  | 39.21                 | 39.12 | 39.20 | 39.21 | 39.22 | 39.20 | <b>39.19</b>           | 37.50                 | 37.60 | 37.25 | 38.50 | 38.50 | 38.00 | <b>37.89</b>           |
| 3       | 3 <sup>rd</sup> Sept  | 39.12                 | 39.15 | 39.26 | 39.22 | 39.23 | 39.55 | <b>39.26</b>           | 37.55                 | 37.65 | 37.58 | 38.54 | 38.50 | 38.20 | <b>38.00</b>           |
| 4       | 4 <sup>th</sup> Sept  | 39.31                 | 39.16 | 39.22 | 39.23 | 39.20 | 39.52 | <b>39.27</b>           | 37.53                 | 37.52 | 37.28 | 37.53 | 37.50 | 37.00 | <b>37.39</b>           |
| 5       | 5 <sup>th</sup> Sept  | 39.22                 | 39.08 | 39.23 | 39.24 | 39.25 | 39.23 | <b>39.21</b>           | 37.50                 | 37.65 | 37.50 | 38.20 | 38.50 | 38.00 | <b>37.89</b>           |
| 6       | 6 <sup>th</sup> Sept  | 39.21                 | 39.28 | 39.22 | 39.22 | 39.62 | 39.22 | <b>39.30</b>           | 37.50                 | 37.75 | 37.28 | 38.20 | 38.50 | 38.00 | <b>37.87</b>           |
| 7       | 7 <sup>th</sup> Sept  | 39.23                 | 39.25 | 39.30 | 39.25 | 39.44 | 39.33 | <b>39.30</b>           | 37.50                 | 37.85 | 37.58 | 38.20 | 37.50 | 38.10 | <b>37.79</b>           |
| 8       | 8 <sup>th</sup> Sept  | 39.25                 | 39.26 | 39.33 | 39.32 | 39.24 | 39.32 | <b>39.29</b>           | 37.50                 | 37.85 | 37.68 | 38.10 | 38.50 | 38.10 | <b>37.96</b>           |
| 9       | 9 <sup>th</sup> Sept  | 39.26                 | 39.22 | 39.24 | 39.20 | 39.24 | 39.26 | <b>39.24</b>           | 37.50                 | 37.85 | 37.78 | 38.20 | 38.50 | 38.00 | <b>37.97</b>           |
| 10      | 10 <sup>th</sup> Sept | 39.13                 | 39.10 | 39.20 | 39.52 | 39.45 | 39.45 | <b>39.31</b>           | 37.50                 | 37.75 | 37.88 | 38.10 | 38.50 | 38.00 | <b>37.96</b>           |

|    |                       |       |       |       |       |       |       |              |       |       |       |       |       |       |              |
|----|-----------------------|-------|-------|-------|-------|-------|-------|--------------|-------|-------|-------|-------|-------|-------|--------------|
| 11 | 11 <sup>th</sup> Sept | 39.17 | 39.15 | 39.25 | 39.22 | 39.25 | 39.25 | <b>39.22</b> | 37.50 | 37.85 | 37.58 | 38.00 | 38.50 | 38.20 | <b>37.94</b> |
| 12 | 12 <sup>th</sup> Sept | 39.18 | 39.26 | 39.27 | 39.20 | 39.29 | 39.21 | <b>39.24</b> | 37.50 | 37.50 | 37.88 | 38.20 | 38.50 | 38.00 | <b>37.93</b> |
| 13 | 13 <sup>th</sup> Sept | 39.12 | 39.50 | 39.26 | 39.25 | 39.20 | 39.20 | <b>39.26</b> | 37.50 | 37.85 | 37.88 | 38.20 | 38.50 | 38.00 | <b>37.99</b> |
| 14 | 14 <sup>th</sup> Sept | 39.11 | 38.40 | 38.24 | 38.23 | 38.32 | 38.35 | <b>38.44</b> | 37.50 | 37.85 | 37.88 | 38.20 | 38.50 | 38.00 | <b>37.99</b> |
| 15 | 15 <sup>th</sup> Sept | 38.52 | 38.52 | 38.23 | 38.22 | 38.22 | 38.22 | <b>38.32</b> | 37.50 | 37.85 | 37.88 | 38.20 | 37.50 | 38.00 | <b>37.82</b> |
| 16 | 16 <sup>th</sup> Sept | 38.18 | 38.30 | 38.22 | 38.25 | 38.52 | 38.52 | <b>38.33</b> | 37.50 | 37.85 | 37.88 | 38.20 | 37.50 | 38.22 | <b>37.86</b> |
| 17 | 17 <sup>th</sup> Sept | 38.13 | 38.28 | 38.52 | 38.52 | 38.52 | 38.36 | <b>38.39</b> | 37.50 | 37.85 | 37.88 | 38.20 | 38.50 | 38.20 | <b>38.02</b> |
| 18 | 18 <sup>th</sup> Sept | 38.52 | 39.25 | 38.52 | 38.52 | 38.52 | 38.52 | <b>38.64</b> | 37.50 | 37.85 | 37.88 | 38.20 | 38.50 | 38.00 | <b>37.99</b> |
| 19 | 19 <sup>th</sup> Sept | 39.22 | 39.22 | 39.37 | 38.52 | 38.52 | 38.52 | <b>38.90</b> | 37.50 | 37.85 | 37.88 | 38.20 | 38.50 | 38.00 | <b>37.99</b> |
| 20 | 20 <sup>th</sup> Sept | 39.13 | 39.26 | 39.35 | 39.21 | 39.47 | 39.22 | <b>39.27</b> | 37.50 | 37.85 | 37.88 | 38.20 | 38.50 | 38.45 | <b>38.06</b> |
| 21 | 21 <sup>st</sup> Sept | 38.52 | 38.28 | 38.52 | 38.52 | 38.52 | 38.52 | <b>38.48</b> | 37.50 | 37.85 | 37.88 | 38.20 | 37.50 | 38.00 | <b>37.82</b> |
| 22 | 22 <sup>nd</sup> Sept | 39.11 | 39.24 | 39.28 | 39.31 | 39.12 | 39.22 | <b>39.21</b> | 37.50 | 37.85 | 37.88 | 38.20 | 38.50 | 38.00 | <b>37.99</b> |
| 23 | 23 <sup>rd</sup> Sept | 39.14 | 39.22 | 39.28 | 39.32 | 38.52 | 39.25 | <b>39.12</b> | 37.57 | 37.85 | 37.88 | 38.20 | 38.50 | 38.23 | <b>38.04</b> |
| 24 | 24 <sup>th</sup> Sept | 39.11 | 39.22 | 39.22 | 39.22 | 38.52 | 39.23 | <b>39.09</b> | 37.58 | 37.85 | 37.88 | 38.20 | 38.50 | 38.24 | <b>38.04</b> |
| 25 | 25 <sup>th</sup> Sept | 39.10 | 39.22 | 39.22 | 39.22 | 39.23 | 39.20 | <b>39.20</b> | 37.55 | 37.85 | 37.88 | 38.20 | 38.50 | 38.35 | <b>38.06</b> |
| 26 | 26 <sup>th</sup> Sept | 39.10 | 39.22 | 39.32 | 39.22 | 39.32 | 39.28 | <b>39.24</b> | 37.55 | 37.85 | 37.88 | 38.20 | 38.50 | 38.35 | <b>38.06</b> |
| 27 | 27 <sup>th</sup> Sept | 39.11 | 39.22 | 39.22 | 39.28 | 39.33 | 39.25 | <b>39.24</b> | 37.50 | 37.85 | 37.88 | 38.20 | 38.50 | 38.00 | <b>37.99</b> |
| 28 | 28 <sup>th</sup> Sept | 39.55 | 39.22 | 39.22 | 39.24 | 39.24 | 39.25 | <b>39.29</b> | 37.55 | 37.85 | 37.88 | 38.20 | 38.50 | 38.27 | <b>38.04</b> |
| 29 | 29 <sup>th</sup> Sept | 39.20 | 39.22 | 39.22 | 39.24 | 39.25 | 39.22 | <b>39.23</b> | 37.50 | 37.85 | 37.70 | 38.20 | 38.50 | 38.00 | <b>37.96</b> |
| 30 | 30 <sup>th</sup> Sept | 39.25 | 39.24 | 39.22 | 39.22 | 39.24 | 39.25 | <b>39.24</b> | 37.55 | 37.35 | 37.75 | 38.20 | 38.50 | 38.00 | <b>37.89</b> |
| 31 | 1 <sup>st</sup> Oct   | 39.26 | 39.28 | 39.24 | 39.24 | 39.25 | 39.20 | <b>39.25</b> | 37.55 | 37.75 | 37.80 | 38.20 | 38.50 | 38.00 | <b>37.97</b> |
| 32 | 2 <sup>nd</sup> Oct   | 39.25 | 39.30 | 39.29 | 39.29 | 39.20 | 39.25 | <b>39.26</b> | 37.55 | 37.85 | 37.88 | 38.20 | 38.50 | 38.00 | <b>38.00</b> |
| 33 | 3 <sup>rd</sup> Oct   | 39.28 | 39.32 | 39.30 | 39.20 | 39.25 | 39.27 | <b>39.27</b> | 37.50 | 37.45 | 37.68 | 38.20 | 38.50 | 38.00 | <b>37.89</b> |
| 34 | 4 <sup>th</sup> Oct   | 38.28 | 38.33 | 38.26 | 38.34 | 38.38 | 38.35 | <b>38.32</b> | 37.20 | 37.75 | 37.58 | 38.20 | 38.50 | 38.00 | <b>37.87</b> |
| 35 | 5 <sup>th</sup> Oct   | 39.12 | 39.28 | 39.27 | 39.28 | 39.22 | 39.20 | <b>39.23</b> | 37.50 | 37.65 | 37.68 | 38.20 | 38.50 | 38.25 | <b>37.96</b> |
| 36 | 6 <sup>th</sup> Oct   | 38.16 | 39.45 | 39.34 | 39.22 | 39.25 | 39.28 | <b>39.12</b> | 37.50 | 37.85 | 37.38 | 38.20 | 37.50 | 38.10 | <b>37.76</b> |
| 37 | 7 <sup>th</sup> Oct   | 38.20 | 39.40 | 39.32 | 39.32 | 39.38 | 39.35 | <b>39.16</b> | 37.50 | 37.85 | 37.28 | 38.20 | 37.50 | 38.00 | <b>37.72</b> |
| 38 | 8 <sup>th</sup> Oct   | 38.22 | 39.60 | 39.12 | 39.33 | 39.20 | 39.25 | <b>39.12</b> | 37.50 | 37.85 | 37.28 | 38.20 | 37.50 | 38.10 | <b>37.74</b> |
| 39 | 9 <sup>th</sup> Oct   | 38.22 | 38.20 | 39.21 | 39.29 | 39.35 | 39.25 | <b>38.92</b> | 37.50 | 37.85 | 37.48 | 38.20 | 37.50 | 38.10 | <b>37.77</b> |
| 40 | 10 <sup>th</sup> Oct  | 38.23 | 38.22 | 39.22 | 38.27 | 38.30 | 39.25 | <b>38.58</b> | 37.50 | 37.85 | 37.35 | 38.20 | 38.50 | 38.00 | <b>37.90</b> |
| 41 | 11 <sup>th</sup> Oct  | 38.00 | 38.05 | 38.02 | 38.01 | 38.02 | 38.03 | <b>38.02</b> | 37.50 | 37.85 | 37.45 | 38.20 | 38.50 | 38.20 | <b>37.95</b> |
| 42 | 12 <sup>th</sup> Oct  | 38.58 | 38.24 | 39.26 | 38.40 | 38.34 | 38.32 | <b>38.52</b> | 37.20 | 37.85 | 37.45 | 38.20 | 38.50 | 38.00 | <b>37.87</b> |
| 43 | 13 <sup>th</sup> Oct  | 38.22 | 38.26 | 38.29 | 38.25 | 38.28 | 38.26 | <b>38.26</b> | 37.30 | 37.85 | 37.88 | 38.20 | 38.50 | 38.00 | <b>37.96</b> |
| 44 | 14 <sup>th</sup> Oct  | 38.25 | 38.29 | 39.33 | 38.25 | 38.22 | 38.23 | <b>38.43</b> | 37.30 | 37.85 | 37.25 | 38.20 | 38.50 | 38.00 | <b>37.85</b> |
| 45 | 15 <sup>th</sup> Oct  | 38.10 | 38.22 | 38.25 | 38.15 | 38.12 | 38.25 | <b>38.18</b> | 37.50 | 37.85 | 37.88 | 38.20 | 38.50 | 38.00 | <b>37.99</b> |
| 46 | 16 <sup>th</sup> Oct  | 38.20 | 38.55 | 38.12 | 38.10 | 38.25 | 38.57 | <b>38.30</b> | 37.65 | 37.80 | 37.55 | 38.00 | 38.00 | 38.20 | <b>37.87</b> |

|                                                         |                            |       |       |       |       |       |       |                        |       |       |       |       |       |       |                        |
|---------------------------------------------------------|----------------------------|-------|-------|-------|-------|-------|-------|------------------------|-------|-------|-------|-------|-------|-------|------------------------|
| <b>47</b>                                               | <b>17<sup>th</sup> Oct</b> | 38.10 | 38.23 | 38.22 | 38.15 | 38.15 | 38.22 | <b>38.18</b>           | 37.55 | 37.82 | 37.56 | 38.10 | 37.85 | 38.10 | <b>37.83</b>           |
| <b>Mean ±SE of Rectal Temperature (RT) °C/<br/>gp A</b> |                            |       |       |       |       |       |       | <b>38.93±<br/>0.01</b> |       |       |       |       |       |       | <b>37.91±<br/>0.04</b> |

RT: Average Rectal Temperature (° C)

**Supplementary Table S4. Physiological assessment: respiratory rate (RR) (Beat Per Minute, BPM) from 1<sup>st</sup> Sept to 17<sup>th</sup> Oct- 2023, study duration for each buffalo of the control (Gp A) and modified group (Gp B)**

| Day no. | Day/month             | RR (bpm) buffalo of Gp B |    |    |    |    |    | Average RR/ gp A (bpm) | RR (BPM) buffalo of Gp B |    |    |    |    |    | Average RR/ gp B (bpm) |
|---------|-----------------------|--------------------------|----|----|----|----|----|------------------------|--------------------------|----|----|----|----|----|------------------------|
|         |                       | A1                       | A2 | A3 | A4 | A5 | A6 |                        | B1                       | B2 | B3 | B4 | B5 | B6 |                        |
| 1       | 1 <sup>st</sup> Sept  | 29                       | 29 | 28 | 28 | 29 | 30 | <b>28.83</b>           | 24                       | 24 | 25 | 25 | 25 | 25 | <b>24.67</b>           |
| 2       | 2 <sup>nd</sup> Sept  | 28                       | 27 | 28 | 28 | 27 | 28 | <b>27.67</b>           | 23                       | 23 | 24 | 24 | 25 | 25 | <b>24.00</b>           |
| 3       | 3 <sup>rd</sup> Sept  | 27                       | 27 | 29 | 28 | 30 | 29 | <b>28.33</b>           | 24                       | 24 | 23 | 25 | 25 | 25 | <b>24.33</b>           |
| 4       | 4 <sup>th</sup> Sept  | 28                       | 30 | 30 | 27 | 28 | 28 | <b>28.50</b>           | 24                       | 24 | 24 | 25 | 25 | 25 | <b>24.50</b>           |
| 5       | 5 <sup>th</sup> Sept  | 29                       | 28 | 29 | 29 | 29 | 29 | <b>28.83</b>           | 23                       | 24 | 24 | 25 | 25 | 25 | <b>24.33</b>           |
| 6       | 6 <sup>th</sup> Sept  | 27                       | 29 | 28 | 30 | 28 | 29 | <b>28.50</b>           | 22                       | 23 | 24 | 24 | 25 | 25 | <b>23.83</b>           |
| 7       | 7 <sup>th</sup> Sept  | 29                       | 29 | 29 | 27 | 28 | 29 | <b>28.50</b>           | 22                       | 24 | 24 | 25 | 25 | 24 | <b>24.00</b>           |
| 8       | 8 <sup>th</sup> Sept  | 29                       | 28 | 28 | 30 | 29 | 30 | <b>29.00</b>           | 23                       | 23 | 24 | 25 | 25 | 24 | <b>24.00</b>           |
| 9       | 9 <sup>th</sup> Sept  | 29                       | 30 | 28 | 30 | 28 | 30 | <b>29.17</b>           | 22                       | 23 | 23 | 24 | 24 | 24 | <b>23.33</b>           |
| 10      | 10 <sup>th</sup> Sept | 28                       | 29 | 28 | 28 | 28 | 30 | <b>28.50</b>           | 23                       | 22 | 24 | 23 | 25 | 24 | <b>23.50</b>           |
| 11      | 11 <sup>th</sup> Sept | 29                       | 29 | 28 | 28 | 29 | 28 | <b>28.50</b>           | 24                       | 23 | 24 | 24 | 24 | 24 | <b>23.83</b>           |
| 12      | 12 <sup>th</sup> Sept | 29                       | 28 | 29 | 28 | 29 | 28 | <b>28.50</b>           | 23                       | 23 | 24 | 24 | 24 | 24 | <b>23.67</b>           |
| 13      | 13 <sup>th</sup> Sept | 29                       | 29 | 28 | 29 | 28 | 29 | <b>28.67</b>           | 22                       | 24 | 23 | 25 | 24 | 24 | <b>23.67</b>           |
| 14      | 14 <sup>th</sup> Sept | 27                       | 26 | 26 | 27 | 26 | 27 | <b>26.50</b>           | 23                       | 23 | 24 | 23 | 24 | 24 | <b>23.50</b>           |
| 15      | 15 <sup>th</sup> Sept | 26                       | 26 | 26 | 26 | 26 | 27 | <b>26.17</b>           | 22                       | 23 | 23 | 24 | 24 | 24 | <b>23.33</b>           |
| 16      | 16 <sup>th</sup> Sept | 27                       | 26 | 26 | 26 | 26 | 27 | <b>26.33</b>           | 22                       | 22 | 23 | 23 | 23 | 24 | <b>22.83</b>           |
| 17      | 17 <sup>th</sup> Sept | 25                       | 25 | 26 | 25 | 27 | 27 | <b>25.83</b>           | 22                       | 23 | 22 | 24 | 23 | 23 | <b>22.83</b>           |
| 18      | 18 <sup>th</sup> Sept | 28                       | 29 | 29 | 28 | 30 | 30 | <b>29.00</b>           | 24                       | 24 | 24 | 24 | 24 | 23 | <b>23.83</b>           |
| 19      | 19 <sup>th</sup> Sept | 29                       | 30 | 30 | 27 | 30 | 29 | <b>29.17</b>           | 24                       | 24 | 24 | 24 | 24 | 23 | <b>23.83</b>           |
| 20      | 20 <sup>th</sup> Sept | 28                       | 29 | 27 | 27 | 30 | 28 | <b>28.17</b>           | 24                       | 24 | 23 | 23 | 24 | 24 | <b>23.67</b>           |
| 21      | 21 <sup>st</sup> Sept | 27                       | 28 | 27 | 26 | 27 | 28 | <b>27.17</b>           | 23                       | 24 | 23 | 22 | 24 | 25 | <b>23.50</b>           |
| 22      | 22 <sup>nd</sup> Sept | 29                       | 29 | 29 | 28 | 30 | 30 | <b>29.17</b>           | 24                       | 23 | 24 | 23 | 23 | 24 | <b>23.50</b>           |
| 23      | 23 <sup>rd</sup> Sept | 29                       | 29 | 28 | 29 | 29 | 29 | <b>28.83</b>           | 23                       | 23 | 24 | 24 | 24 | 23 | <b>23.50</b>           |
| 24      | 24 <sup>th</sup> Sept | 28                       | 29 | 29 | 29 | 29 | 29 | <b>28.83</b>           | 23                       | 22 | 24 | 25 | 24 | 24 | <b>23.67</b>           |

|                                 |                       |    |    |    |    |    |    |                                       |                                 |    |    |    |    |    |                                        |
|---------------------------------|-----------------------|----|----|----|----|----|----|---------------------------------------|---------------------------------|----|----|----|----|----|----------------------------------------|
| 25                              | 25 <sup>th</sup> Sept | 28 | 29 | 28 | 28 | 29 | 29 | <b>28.50</b>                          | 22                              | 23 | 24 | 24 | 24 | 24 | <b>23.50</b>                           |
| 26                              | 26 <sup>th</sup> Sept | 29 | 30 | 29 | 29 | 30 | 29 | <b>29.33</b>                          | 21                              | 24 | 23 | 24 | 25 | 23 | <b>23.33</b>                           |
| 27                              | 27 <sup>th</sup> Sept | 29 | 29 | 29 | 29 | 30 | 29 | <b>29.17</b>                          | 23                              | 24 | 24 | 24 | 23 | 23 | <b>23.50</b>                           |
| 28                              | 28 <sup>th</sup> Sept | 29 | 29 | 29 | 29 | 29 | 28 | <b>28.83</b>                          | 24                              | 25 | 23 | 24 | 24 | 25 | <b>24.17</b>                           |
| 29                              | 29 <sup>th</sup> Sept | 30 | 30 | 29 | 29 | 30 | 30 | <b>29.67</b>                          | 24                              | 25 | 22 | 24 | 24 | 25 | <b>24.00</b>                           |
| 30                              | 30 <sup>th</sup> Sept | 29 | 30 | 30 | 29 | 30 | 29 | <b>29.50</b>                          | 24                              | 24 | 24 | 22 | 24 | 25 | <b>23.83</b>                           |
| 31                              | 1 <sup>st</sup> Oct   | 29 | 29 | 29 | 30 | 29 | 30 | <b>29.33</b>                          | 22                              | 24 | 23 | 23 | 24 | 25 | <b>23.50</b>                           |
| 32                              | 2 <sup>nd</sup> Oct   | 29 | 29 | 29 | 28 | 29 | 29 | <b>28.83</b>                          | 22                              | 23 | 24 | 25 | 24 | 23 | <b>23.50</b>                           |
| 33                              | 3 <sup>rd</sup> Oct   | 29 | 29 | 29 | 28 | 29 | 29 | <b>28.83</b>                          | 23                              | 24 | 24 | 24 | 25 | 24 | <b>24.00</b>                           |
| 34                              | 4 <sup>th</sup> Oct   | 27 | 27 | 27 | 27 | 27 | 27 | <b>27.00</b>                          | 24                              | 25 | 24 | 24 | 24 | 25 | <b>24.33</b>                           |
| 35                              | 5 <sup>th</sup> Oct   | 27 | 28 | 28 | 27 | 27 | 27 | <b>27.33</b>                          | 24                              | 25 | 24 | 24 | 25 | 24 | <b>24.33</b>                           |
| 36                              | 6 <sup>th</sup> Oct   | 27 | 27 | 27 | 27 | 27 | 28 | <b>27.17</b>                          | 22                              | 24 | 23 | 24 | 23 | 23 | <b>23.17</b>                           |
| 37                              | 7 <sup>th</sup> Oct   | 27 | 27 | 27 | 26 | 26 | 26 | <b>26.50</b>                          | 21                              | 24 | 23 | 23 | 22 | 22 | <b>22.50</b>                           |
| 38                              | 8 <sup>th</sup> Oct   | 27 | 27 | 26 | 27 | 27 | 27 | <b>26.83</b>                          | 23                              | 24 | 22 | 23 | 23 | 23 | <b>23.00</b>                           |
| 39                              | 9 <sup>th</sup> Oct   | 28 | 27 | 27 | 27 | 27 | 26 | <b>27.00</b>                          | 22                              | 23 | 24 | 23 | 23 | 23 | <b>23.00</b>                           |
| 40                              | 10 <sup>th</sup> Oct  | 27 | 27 | 27 | 27 | 26 | 25 | <b>26.50</b>                          | 24                              | 24 | 23 | 25 | 25 | 24 | <b>24.17</b>                           |
| 41                              | 11 <sup>th</sup> Oct  | 25 | 26 | 26 | 26 | 26 | 27 | <b>26.00</b>                          | 24                              | 25 | 25 | 24 | 25 | 25 | <b>24.67</b>                           |
| 42                              | 12 <sup>th</sup> Oct  | 27 | 27 | 27 | 26 | 27 | 27 | <b>26.83</b>                          | 23                              | 23 | 24 | 24 | 24 | 25 | <b>23.83</b>                           |
| 43                              | 13 <sup>th</sup> Oct  | 28 | 27 | 26 | 27 | 27 | 27 | <b>27.00</b>                          | 22                              | 23 | 23 | 23 | 24 | 25 | <b>23.33</b>                           |
| 44                              | 14 <sup>th</sup> Oct  | 27 | 27 | 27 | 27 | 26 | 26 | <b>26.67</b>                          | 23                              | 25 | 23 | 24 | 24 | 24 | <b>23.83</b>                           |
| 45                              | 15 <sup>th</sup> Oct  | 27 | 27 | 28 | 27 | 27 | 27 | <b>27.17</b>                          | 24                              | 23 | 25 | 24 | 24 | 25 | <b>24.17</b>                           |
| 46                              | 16 <sup>th</sup> Oct  | 27 | 27 | 27 | 27 | 27 | 26 | <b>26.83</b>                          | 25                              | 24 | 24 | 23 | 24 | 24 | <b>24.00</b>                           |
| 47                              | 17 <sup>th</sup> Oct  | 27 | 27 | 26 | 26 | 26 | 27 | <b>26.50</b>                          | 24                              | 24 | 24 | 24 | 24 | 25 | <b>24.17</b>                           |
| Mean $\pm$ SE of RR (bpm)/ gp A |                       |    |    |    |    |    |    | <b>27.96<math>\pm</math><br/>0.16</b> | Mean $\pm$ SE of RR (bpm)/ gp B |    |    |    |    |    | <b>23.73 <math>\pm</math><br/>0.07</b> |

RR (bpm): Respiratory rate (beat per minute)
